# Supplementary material for: Plasma metabolites changes in male heroin addicts during acute and protracted withdrawal
Source: publisher site journal article supplement (doi:10.18632/aging.203311), 2021-07-19
Supplement: Supplementary file [file aging-v13i14-203311-supplementary-material-SD1.pdf]

## SUPPLEMENTARY FIGURE

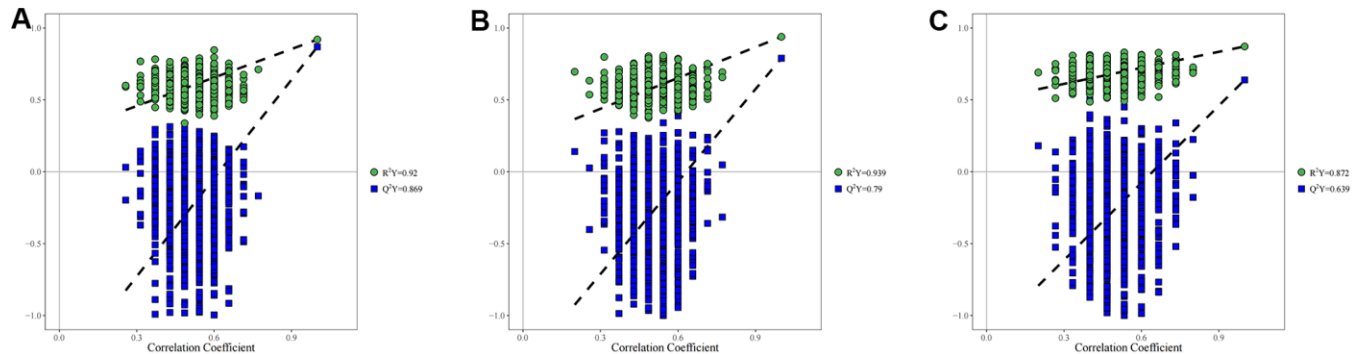

**Supplementary Figure 1. Validation plot the OPLS-DA obtained from 1,000-times permutation tests. (A)** Statistical validation of the OPLS-DA model by permutation testing between healthy controls and acute heroin withdrawal. **(B)** Statistical validation of the OPLS-DA model by permutation testing between long-term heroin withdrawal and acute heroin withdrawal. **(C)** Statistical validation of the OPLS-DA model by permutation testing between healthy controls and long-term heroin withdrawal.
